# Supplementary material for: Genomic, Transcriptomic and Enzymatic Insight into Lignocellulolytic System of a Plant Pathogen Dickeya sp. WS52 to Digest Sweet Pepper and Tomato Stalk
Source: MDPI journal article supplement (doi:10.3390/biom9120753), 2019-11-20
Supplement: s1 [file s1]

**Title: Genomic, transcriptomic and enzymatic insight into lignocellulolytic system of a plant pathogen *Dickeya* sp. WS52 to digest sweet pepper and tomato stalk**

Yingjie Yang<sup>1,†</sup>, Wei Lin<sup>2,†</sup>, Raghvendra Pratap Singh<sup>3,\*</sup>, Qian Xu<sup>2</sup>, Zhihou Chen<sup>2</sup>, Yuan Yuan<sup>1</sup>, Ping Zou<sup>1</sup>, Yiqiang Li<sup>1</sup> and Chengsheng Zhang<sup>1,\*</sup>

1 Marine Agriculture Research Center, Tobacco Research Institute, Chinese Academy of Agricultural Sciences, Qingdao, Shandong 266101, China

YJY: yingjieyoung@sina.com; YY: yuanyuan03@caas.cn; PZ: zouping@caas.cn; CSZ: zhchengsheng@126.com; YL: liyiqiang@caas.cn.

2 Tobacco Research Institute of Nanping, Nanping, Fujian, 353000, China

WL: lw160718@163.com; QX:xq711126@163.com; ZHC: hhh0599@163.com

3 Department of Research & Development cell, Biotechnology, Uttaranchal University, Dehradun 248007, India RPS: rpsingh@uttaranchaluniversity.ac.in

\*To whom correspondence should be addressed: rpsingh@uttaranchaluniversity.ac.in (R.P. Singh); zhangchengsheng@caas.cn (C. S. Zhang)

† These authors contributed equally to this work.

## List of supporting materials

Figure S1. the surface symptom (Figure S1A) and the inner symptom (Figure S1B) of soft-rotten tobacco plant infected by *Dickeya* sp. WS52.

Figure S2. Classification of Raw Reads of three samples (A) Classification of Raw Reads of LB; (B) Classification of Raw Reads of Pep; (C) Classification of Raw Reads of Tmt.

Figure S3. Reads density in chromosome of three samples (A) Reads density of LB in chromosome; (B) Reads density of Pep in chromosome; (C) Reads density of Tmt in chromosome.

Figure S4. Distribution of reads mapped to genomic regions of three samples. (A) Distribution of reads mapped to genomic regions in LB; (B) Distribution of reads mapped to genomic regions in Pep; (C) Distribution of reads mapped to genomic regions in Tmt.

Figure S5. FPKM distribution for all samples

Figure S6. The correlation between samples. (A) the correlation in LB vs Pep; (B) the correlation in LB vs Tmt; (C) the correlation in Pep vs Tmt; (D) Pearson correlation between samples.

Figure S7. the overall distribution of DEGs in three samples. (A) LB vs Pep; (B) LB vs Tmt; (C) Pep vs Tmt.

Figure S8. Comparisons of the number and overlapping relationships of DEGs between different samples. (A) the total regulated DEGs shown in Ven map; (B) the upregulated DEGs shown in Ven map; (C) the downregulated DEGs shown in Ven map. Purple circle represents number of DEGs between Tmt vs Pep; yellow circle stand for number of DEGs between Pep vs LB; blue circle stand for number of DEGs between Tmt vs LB. The overlapping region means shared DEGs of two comparable groups.

Figure S9. The most enriched GO terms between Pep and Tmt.

Table S1 the identification of strain WS52 based on ANI

Table S2 transcriptome data output of three samples

Table S3 percentages of genes in different expression levels

Table S4 percentages of reads mapping to the reference genome

Table S5 the transcriptional level of potentially lignin degradation related genes in MSM + vegetable stalks compared to LB medium

Table S6 the transcriptome of ribosomal proteins in MSM + pepper or tomato stalk compared to LB medium

Table S7 the transcriptome of flagellar-forming proteins in MSM + pepper or tomato stalk compared to LB medium

Table S8 the transcriptome related with capsular in MSM + pepper or tomato stalk compared to LB medium

Table S9 the transcriptome of type II secretion system protein in MSM + pepper or tomato stalk compared to LB medium

Table S10 the transcriptome of type III secretion system protein in MSM + pepper or tomato stalk compared to LB medium

Table S11 the transcriptome of type VI secretion system protein in MSM + pepper or tomato stalk compared to LB medium

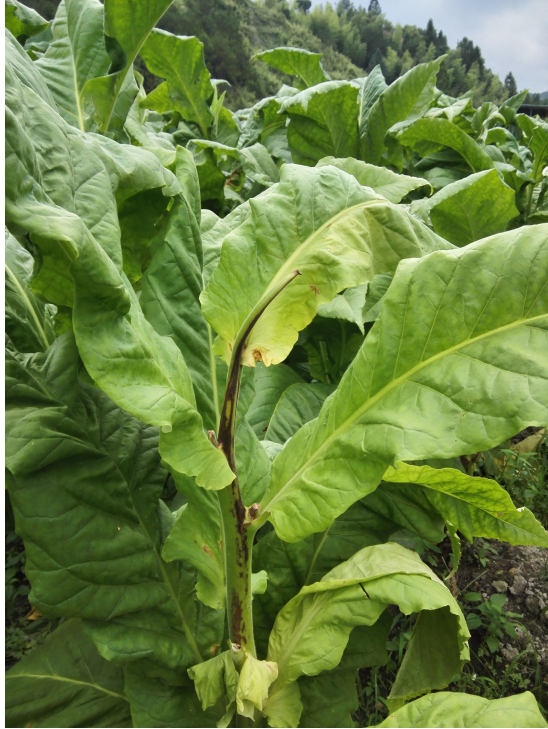

Figure S1A

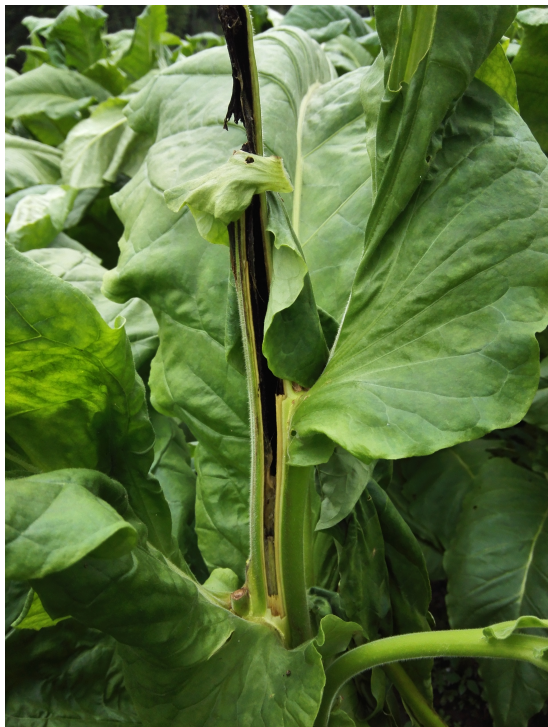

Figure S1B

Figure S1: the surface symptom (Figure S1A) and the inner symptom (Figure S1B) of soft-rotten tobacco plant infected by *Dickeya* sp. WS52.

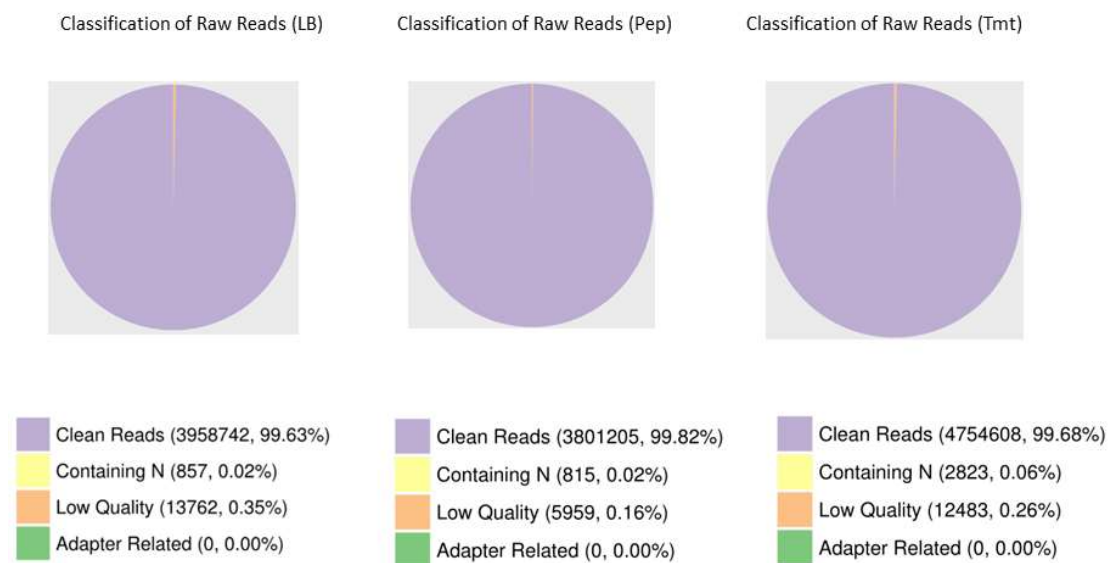

Figure S2. Classification of Raw Reads of three samples (A) Classification of Raw Reads of LB; (B) Classification of Raw Reads of Pep; (C) Classification of Raw Reads of Tmt.

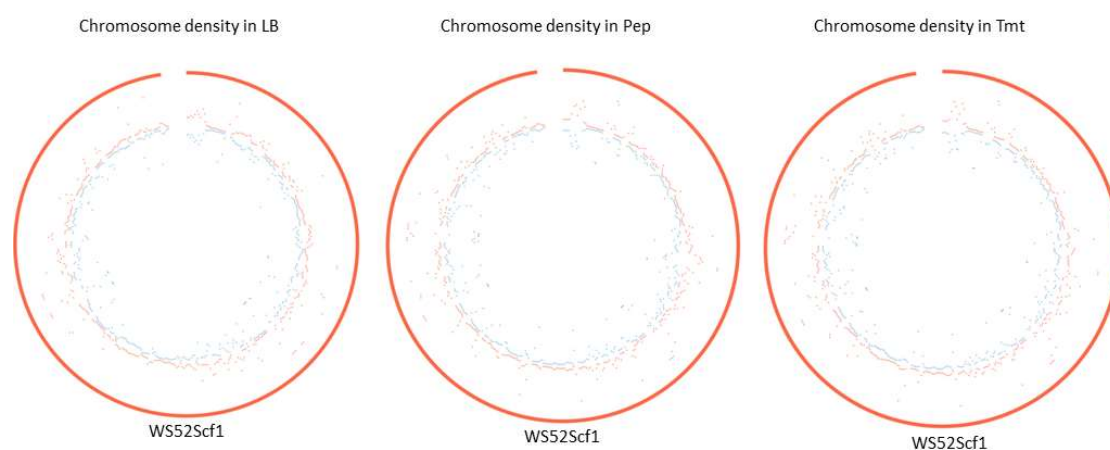

Figure S3. Reads density in chromosome of three samples (A) Reads density of LB in chromosome; (B) Reads density of Pep in chromosome; (C) Reads density of Tmt in chromosome.

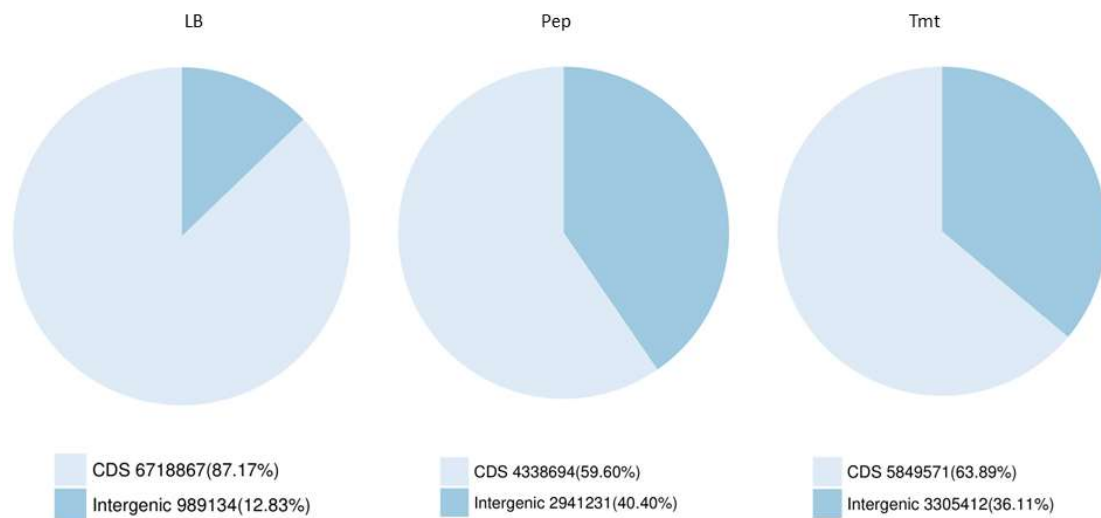

Figure S4. Distribution of reads mapped to genomic regions of three samples. (A) Distribution of reads mapped to genomic regions in LB; (B) Distribution of reads mapped to genomic regions in Pep; (C) Distribution of reads mapped to genomic regions in Tmt.

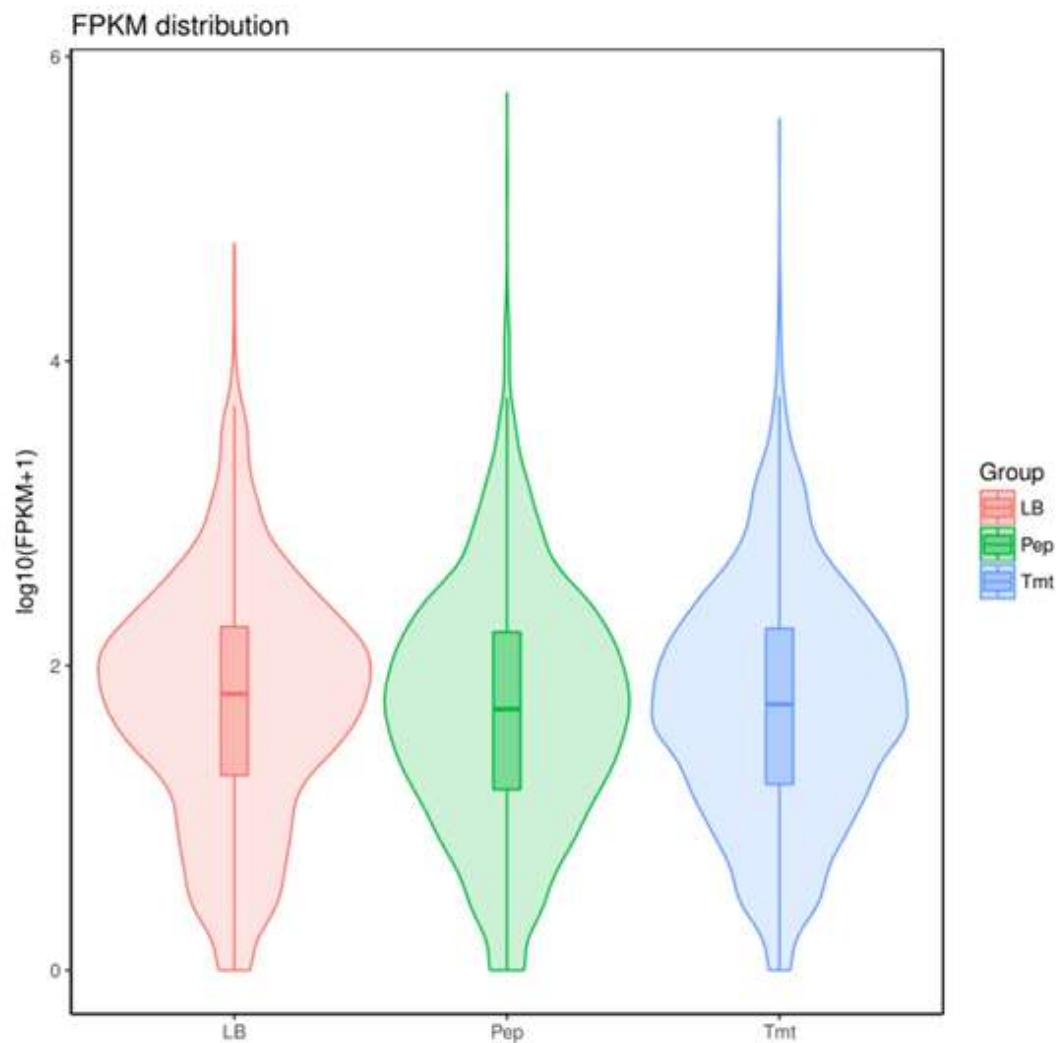

Figure S5. FPKM distribution for all samples

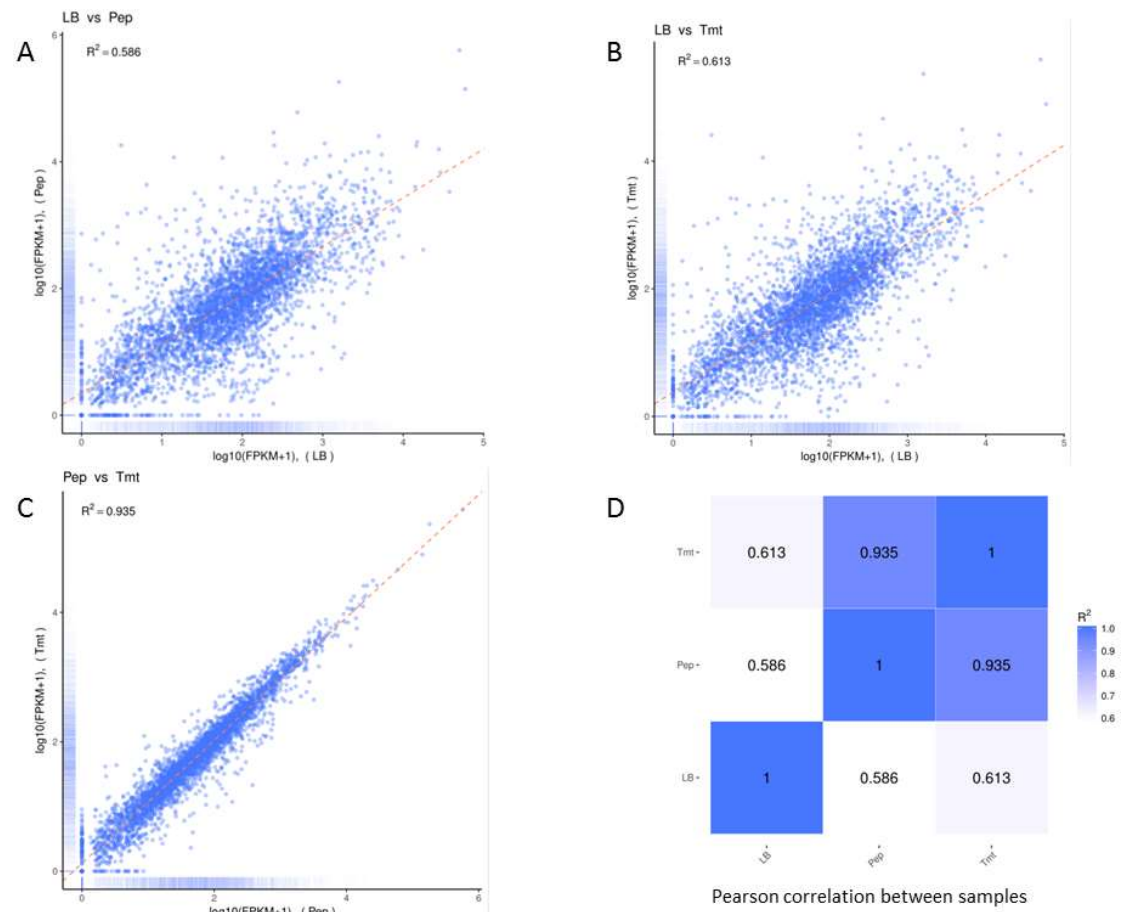

Figure S6. The correlation between samples. (A) the correlation in LB vs Pep; (B) the correlation in LB vs Tmt; (C) the correlation in Pep vs Tmt; (D) Pearson correlation between samples.

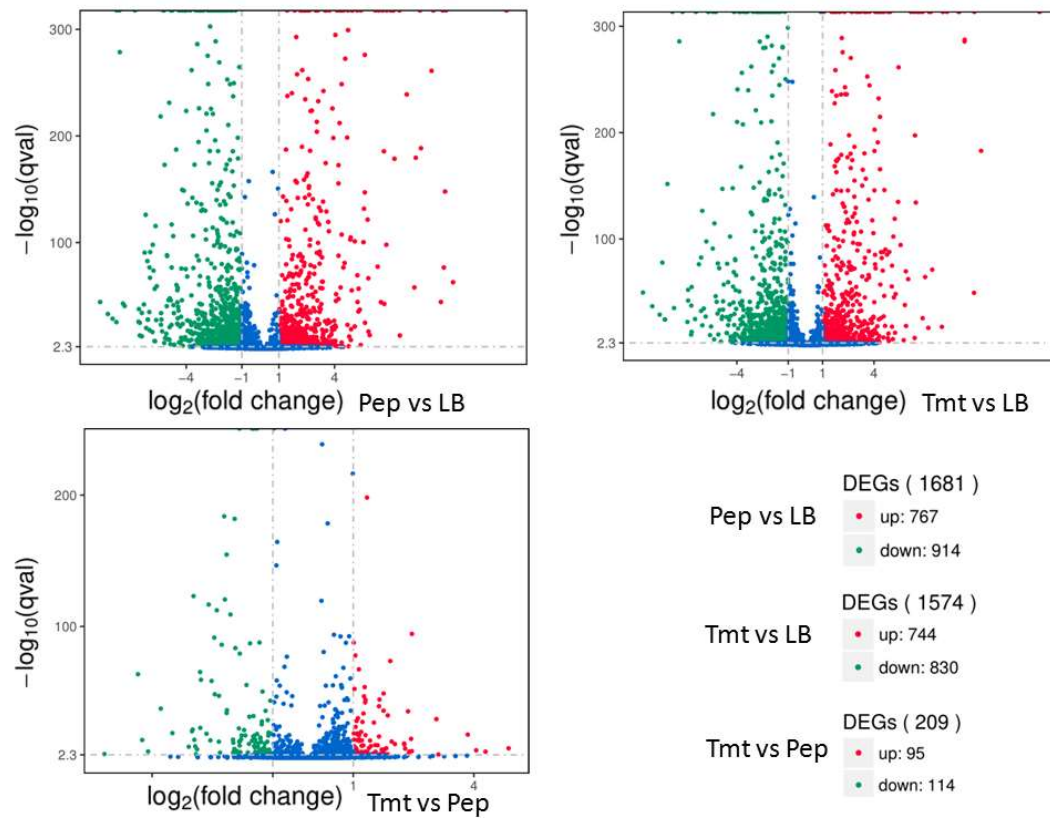

Figure S7. the overall distribution of DEGs in three samples. (A) LB vs Pep; (B) LB vs Tmt; (C) Pep vs Tmt.



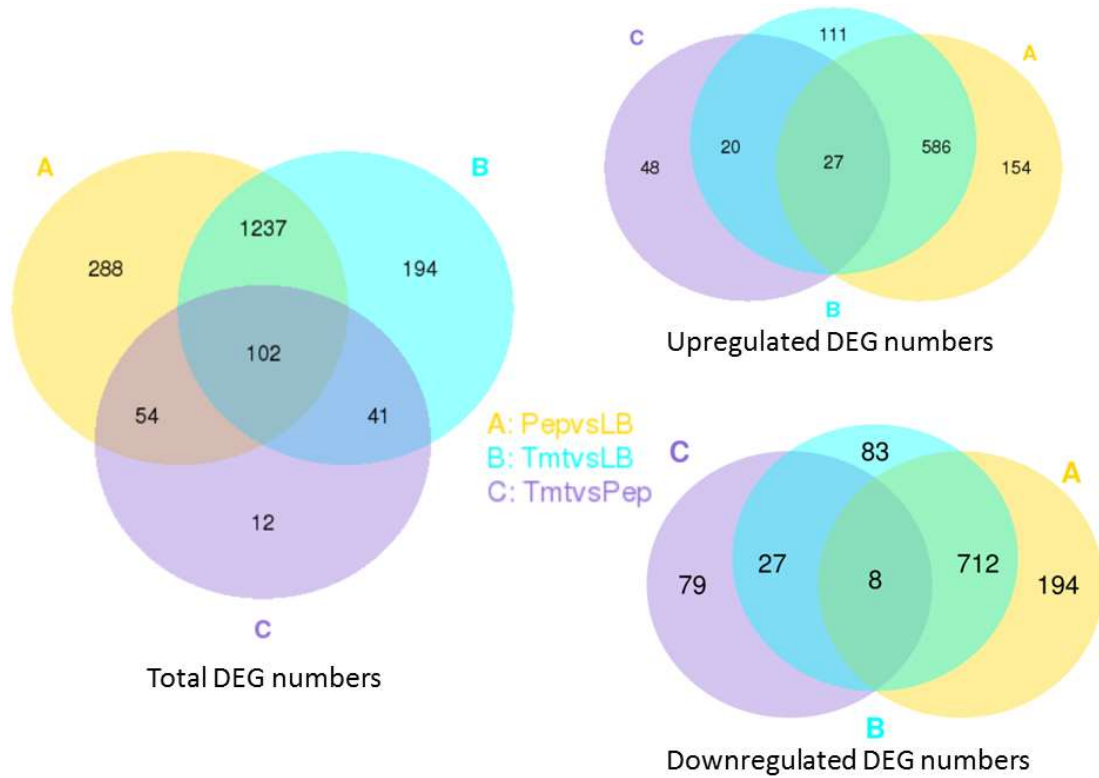

Figure S8. Comparisons of the number and overlapping relationships of DEGs between different samples. (A) the total regulated DEGs shown in Ven map; (B) the upregulated DEGs shown in Ven map; (C) the downregulated DEGs shown in Ven map. Purple circle represents number of DEGs between Tmt vs Pep; yellow circle stand for number of DEGs between Pep vs LB; blue circle stand for number of DEGs between Tmt vs LB. The overlapping region means shared DEGs of two comparable groups.



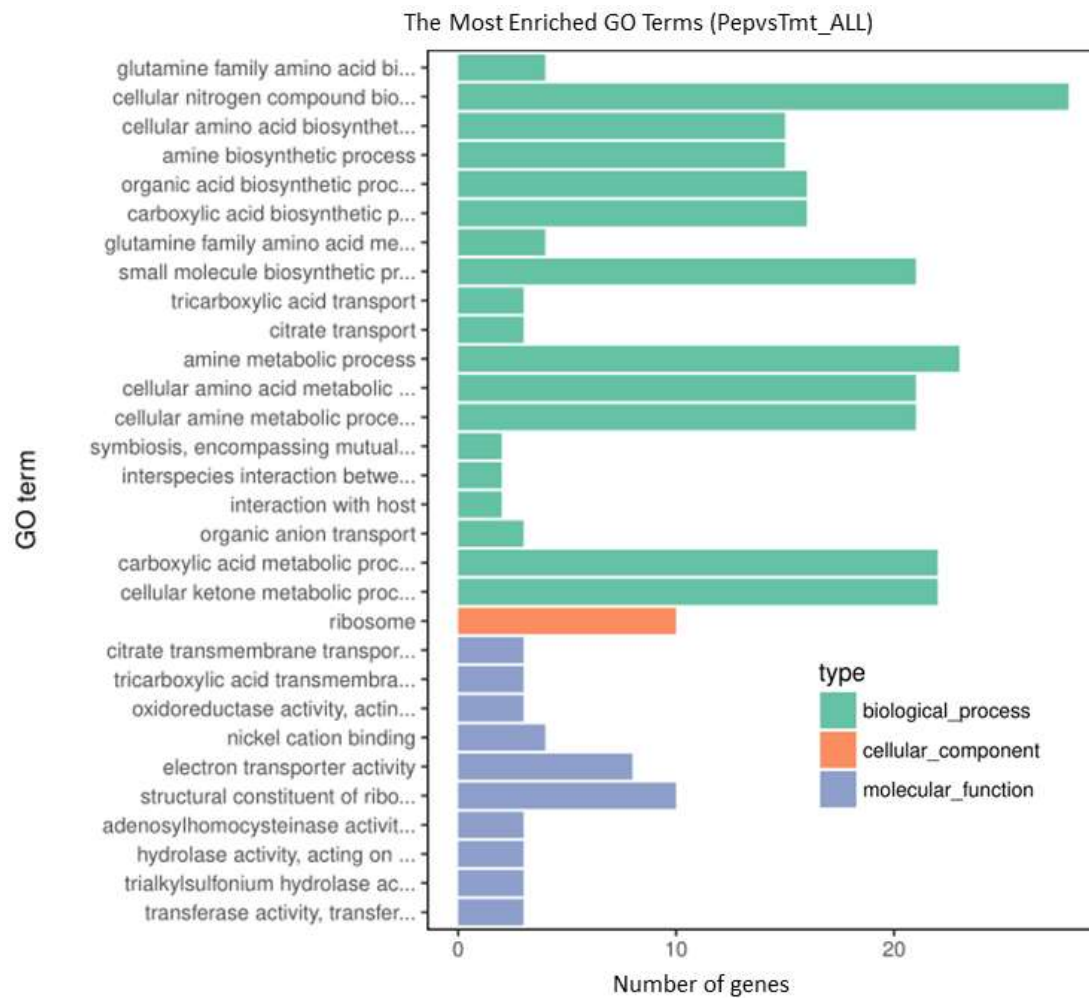

Figure S9 The most enriched GO terms between Pep and Tmt.

Table S1 the identification of strain WS52 based on ANI

| strains                                         | ANI     |
|-------------------------------------------------|---------|
| Dickeya_sp. 52                                  | 100     |
| Dickeya_chrysanthemi_NCPPB_3533                 | 98.4462 |
| Dickeya_chrysanthemi_NCPPB_516                  | 97.8787 |
| Dickeya_chrysanthemi_NCPPB_402                  | 96.4491 |
| Dickeya_dadantii_NCPPB_898                      | 86.716  |
| Dickeya_dianthicola_NCPPB_453                   | 86.6042 |
| Dickeya_sp._NCPPB_3274                          | 86.5572 |
| Dickeya_solani_IPO_2222                         | 86.451  |
| Dickeya_zeae_Ech586                             | 85.8197 |
| Dickeya_zeae_NCPPB_3532                         | 85.7944 |
| Dickeya_zeae_NCPPB_2538                         | 85.6397 |
| Dickeya_sp._DW_0440                             | 79.8501 |
| Dickeya_sp._CSL_RW240                           | 79.8201 |
| Pectobacterium_atrosepticum_strain_NCPPB_549    | 75.2923 |
| Pectobacterium_wasabiae_RNS08.42.1A             | 75.2704 |
| Pectobacterium_wasabiae_CFBP_3304               | 75.2322 |
| Pectobacterium_carotovorum_brasiliense_LMG21371 | 75.5554 |

Table S2 transcriptome data output of three samples

| Samp<br>le | Raw<br>Reads | Raw<br>Bases | Clean<br>Reads | Clean<br>Bases | Error<br>Rate | Q20<br>%   | Q30<br>%   | GC<br>Content |
|------------|--------------|--------------|----------------|----------------|---------------|------------|------------|---------------|
| LB_1       | 3973361      | 0.59G        | 3958742        | 0.59G          | 0.01%         | 98.76<br>% | 96.15<br>% | 53.41%        |
| LB_2       | 3973361      | 0.59G        | 3958742        | 0.59G          | 0.01%         | 97.57<br>% | 93.87<br>% | 52.90%        |
| Pep_1      | 3807979      | 0.57G        | 3801205        | 0.57G          | 0.01%         | 98.79<br>% | 96.24<br>% | 52.63%        |
| Pep_2      | 3807979      | 0.57G        | 3801205        | 0.57G          | 0.01%         | 98.22<br>% | 95.28<br>% | 52.21%        |
| Tmt_<br>1  | 4769914      | 0.71G        | 4754608        | 0.71G          | 0.01%         | 99.03<br>% | 96.76<br>% | 52.74%        |
| Tmt_<br>2  | 4769914      | 0.71G        | 4754608        | 0.71G          | 0.01%         | 98.39<br>% | 95.65<br>% | 52.33%        |

Table S3 percentages of reads mapping to the reference genome

| Sample name      | LB               | Pep              | Tmt              |
|------------------|------------------|------------------|------------------|
| Total reads      | 7917484          | 7602410          | 9509216          |
| Total mapped     | 7825522 (98.84%) | 7494664 (98.58%) | 9403391 (98.89%) |
| Multiple mapped  | 251101 (3.17%)   | 383899 (5.05%)   | 433671 (4.56%)   |
| Uniquely mapped  | 7574421 (95.67%) | 7110765 (93.53%) | 8969720 (94.33%) |
| Read-1           | 3785604 (47.81%) | 3556456 (46.78%) | 4484768 (47.16%) |
| Read-2           | 3788817 (47.85%) | 3554309 (46.75%) | 4484952 (47.16%) |
| Reads map to '+' | 3787545 (47.84%) | 3554772 (46.76%) | 4484603 (47.16%) |
| Reads map to '-' | 3786876 (47.83%) | 3555993 (46.77%) | 4485117 (47.17%) |

Table S4 percentages of genes in different expression levels

| FPKM Interval | LB           | Pep          | Tmt          |
|---------------|--------------|--------------|--------------|
| 0~1           | 191(4.60%)   | 192(4.62%)   | 141(3.40%)   |
| 1~3           | 228(5.49%)   | 205(4.94%)   | 216(5.20%)   |
| 3~15          | 579(13.95%)  | 726(17.49%)  | 687(16.55%)  |
| 15~60         | 1043(25.12%) | 1121(27.00%) | 1138(27.41%) |
| >60           | 2111(50.84%) | 1908(45.95%) | 1970(47.45%) |

Table S5 the transcriptional level of potentially lignin-degradation related genes in MSM + vegetable stalks compared to LB medium

| ORF number<br>(TYL) | log2FC<br>in Pep | log2FC<br>in Tmt | annotation                                  |
|---------------------|------------------|------------------|---------------------------------------------|
| 44660.1             | 3.19             | 2.10             | (AA2)multicopper oxidase                    |
| 44482.1             | 3.33             | 3.69             | (AA3)GMC family oxidoreductase              |
| 43757.1             | n.d.             | n.d.             | (AA6)flavodoxin family protein              |
| 41583.1             | n.d.             | n.d.             | (AA6)flavodoxin family protein              |
| 43996.1             | n.d.             | n.d.             | hydrogen peroxide-inducible genes activator |
| 43983.1             | n.d.             | n.d.             | quinone oxidoreductase                      |
| 43984.1             | -1.25            | n.d.             | quinone oxidoreductase                      |
| 43985.1             | n.d.             | n.d.             | quinone oxidoreductase                      |
| 43986.1             | n.d.             | n.d.             | quinone oxidoreductase                      |
| 43987.1             | n.d.             | n.d.             | quinone oxidoreductase                      |
| 43988.1             | n.d.             | n.d.             | quinone oxidoreductase                      |
| 43989.1             | n.d.             | n.d.             | quinone oxidoreductase                      |
| 43990.1             | -1.10            | -1.20            | quinone oxidoreductase                      |
| 43991.1             | -1.22            | -1.30            | quinone oxidoreductase                      |
| 43992.1             | -1.01            | n.d.             | quinone oxidoreductase                      |
| 43993.1             | -1.31            | n.d.             | quinone oxidoreductase                      |
| 43994.1             | n.d.             | n.d.             | quinone oxidoreductase                      |
| 43995.1             | n.d.             | n.d.             | quinone oxidoreductase                      |

|         |        |       |                                             |
|---------|--------|-------|---------------------------------------------|
| 44756.1 | n.d.   | n.d.  | glutathione S-transferases                  |
| 44033.1 | 1.49   | n.d.  | glutathione S-transferases                  |
| 43409.1 | n.d.   | n.d.  | glutathione S-transferases                  |
| 42345.1 | 1.84;  | 2.26  | glutathione S-transferases                  |
| 41649.1 | n.d.   | n.d.  | glutathione S-transferases                  |
| 41540.1 | -2.12; | -2.16 | glutathione S-transferases                  |
| 41013.1 | n.d.   | n.d.  | glutathione S-transferases                  |
| 41021.1 | n.d.   | n.d.  | glutathione S-transferases                  |
| 43777.1 | n.d.   | n.d.  | catalase-peroxidase                         |
| 43797.1 | -2.60  | -1.89 | Peroxidase                                  |
| 43245.1 | 2.98   | 4.76  | glutathione peroxidase                      |
| 43246.1 | n.d.   | n.d.  | hydrogen peroxide-inducible genes activator |
| 43612.1 | n.d.   | n.d.  | glutathione peroxidase                      |
| 41016.1 | n.d.   | n.d.  | glutathione peroxidase                      |

Table S6 the transcriptome of ribosomal proteins in MSM + pepper or tomato stalk compared to LB medium

| No. of orf<br>(TYL) | log2FC<br>in Pep | log2FC<br>in Tmt | Annotation                                |
|---------------------|------------------|------------------|-------------------------------------------|
| 40843.1             | -2.56            | -1.48            | 50S ribosomal protein L17                 |
| 40844.1             | -2.61            | -1.66            | DNA-directed RNA polymerase subunit alpha |
| 40845.1             | -2.21            | -1.39            | 30S ribosomal protein S4                  |
| 40846.1             | -1.83            | -1.32            | 30S ribosomal protein S11, partial        |
| 40847.1             | -1.72            | -1.39            | 30S ribosomal protein S13                 |
| 40848.1             | -1.11            | -1.02            | 50S ribosomal protein L36                 |
| 40849.1             | -1.83            | -1.46            | preprotein translocase subunit SecY       |
| 40850.1             | -2.84            | -1.97            | 50S ribosomal protein L15                 |
| 40852.1             | -3.23            | -2.34            | 30S ribosomal protein S5                  |
| 40853.1             | -3.19            | -2.17            | 50S ribosomal protein L18                 |
| 40854.1             | -3.21            | -1.93            | 50S ribosomal protein L6                  |
| 40855.1             | -2.76            | -1.72            | 30S ribosomal protein S8                  |
| 40856.1             | -2.12            | -1.19            | 30S ribosomal protein S14                 |
| 40857.1             | -1.73            | -1.05            | 50S ribosomal protein L5                  |
| 40858.1             | -1.25            | -1.17            | 50S ribosomal protein L24                 |
| 40859.1             | -1.63            | -1.79            | 50S ribosomal protein L14                 |
| 40860.1             | -2.34            | -1.65            | 30S ribosomal protein S17                 |
| 40861.1             | -2.19            | -2.39            | 50S ribosomal protein L29                 |
| 40862.1             | -3.34            | -2.78            | 50S ribosomal protein L16                 |
| 40863.1             | -4.00            | -2.50            | 30S ribosomal protein S3                  |
| 40864.1             | -4.13            | -2.50            | 50S ribosomal protein L22                 |
| 40865.1             | -4.79            | -2.59            | 30S ribosomal protein S19                 |
| 40866.1             | -4.26            | -1.58            | 50S ribosomal protein L2                  |
| 40867.1             | -2.85            | -1.98            | 50S ribosomal protein L23                 |
| 40868.1             | -3.23            | -1.94            | 50S ribosomal protein L4                  |

|         |       |       |                           |
|---------|-------|-------|---------------------------|
| 40869.1 | -2.82 | -1.85 | 50S ribosomal protein L3  |
| 40870.1 | -2.56 | -1.97 | 30S ribosomal protein S10 |

Table S7 the transcriptome of flagellar-forming proteins in MSM + pepper or tomato stalk compared to LB medium

| No. of orf<br>(TYL) | log2FC<br>in Pep | log2FC<br>in Tmt | Annotation                                         |
|---------------------|------------------|------------------|----------------------------------------------------|
| 43505.1             | 2.26             | 2.07             | flagellar transcriptional activator FlhD           |
| 43506.1             | 1.57             | 1.55             | flagellar transcriptional activator FlhC           |
| 43507.1             | 2.05             | 2.24             | flagellar motor protein MotA                       |
| 43507.1             | 1.15             | 1.69             | flagellar motor protein MotB                       |
| 43508.1             | 1.46             | 1.12             | chemotaxis protein CheW                            |
| 43510.1             | 1.90             | 1.81             | Hemotaxis protein-glutamate<br>O-methyltransferase |
| 43514.1             | 2.37             | 2.56             | flagellar biosynthesis protein FlhB                |
| 43517.1             | 2.63             | 2.65             | flagellar biosynthesis protein Flg                 |
| 43518.1             | 3.54             | 3.21             | flagellar biosynthesis protein FlgM                |
| 43539.1             | 1.72             | 1.11             | flagellar protein FliJ                             |
| 43545.1             | 2.65             | 3.34             | flagellar protein FliS                             |
| 43546.1             | 2.98             | 3.02             | flagellar hook protein FliD                        |

Table S8 the transcriptome related with capsular in MSM + pepper or tomato stalk compared to LB medium

| No. of orf<br>(TYL) | log2FC<br>in Pep | log2FC<br>in Tmt | Annotation                                   |
|---------------------|------------------|------------------|----------------------------------------------|
| 42892.1             | -3.04            | -2.74            | capsular biosynthesis protein                |
| 42893.1             | -3.10            | -2.64            | capsular biosynthesis protein                |
| 42894.1             | -2.55            | -2.32            | capsular biosynthesis protein                |
| 42895.1             | -1.66            | -3.55            | capsular biosynthesis protein                |
| 42896.1             | -3.29            | -1.25            | capsular polysaccharide biosynthesis protein |

Table S9 the transcriptome of type II secretion system protein in MSM + pepper or tomato stalk compared to LB medium

| No. of orf<br>(TYL) | log2FC<br>in Pep | log2FC<br>in Tmt | Annotation                                                                   |
|---------------------|------------------|------------------|------------------------------------------------------------------------------|
| 44086.1             | -1.60            | -1.72            | type II secretion protein M                                                  |
| 44087.1             | -1.66            | -2.08            | type II secretion system protein GspL                                        |
| 44088.1             | -1.32            | -2.65            | Type II secretion system protein K; Pectic<br>enzymes secretion protein OutK |
| 44089.1             | -1.64            | -2.82            | general secretion pathway protein J                                          |
| 44090.1             | -1.69            | -2.60            | type II secretion system protein GspI                                        |
| 44091.1             | -2.20            | -2.94            | general secretion pathway protein H                                          |
| 44092.1             | -3.12            | -4.20            | type II secretion system protein GspG                                        |
| 44093.1             | -2.13            | -3.40            | type II secretion system protein GspF                                        |

|         |       |       |                                        |
|---------|-------|-------|----------------------------------------|
| 44094.1 | -1.90 | -2.51 | type II secretion system protein GspE  |
| 44095.1 | -1.41 | -2.13 | type II secretion system protein GspD  |
| 44096.1 | -2.04 | -1.80 | type II secretion system protein GspC  |
| 41260.1 | 2.79  | 3.67  | type II secretion system protein GspD  |
| 41262.1 | 2.25  | 2.82  | general secretion pathway protein GspF |
| 41266.1 | 2.02  | 2.06  | general secretion pathway protein GspL |

Table S10 the transcriptome of type III secretion system protein in MSM + pepper or tomato stalk compared to LB medium

| No. of orf (TYL) | log2FC in Pep | log2FC in Tmt | Annotation                                                                  |
|------------------|---------------|---------------|-----------------------------------------------------------------------------|
| 41618.1          | 2.43          | 2.51          | EscC/YscC/HrcC family type III secretion system outer membrane ring protein |
| 41701.1          | 2.64          | 3.08          | type III secretion apparatus lipoprotein, YscJ/HrcJ family                  |
| 44125.1          | -2.55         | -2.59         | type III secretion system effector                                          |
| 44126.1          | -1.85         | -1.63         | virulence factor SrfB                                                       |

Table S11 the transcriptome of type VI secretion system protein in MSM + pepper or tomato stalk compared to LB medium

| No. of orf (TYL) | log2FC in Pep | log2FC in Tmt | Annotation                                |
|------------------|---------------|---------------|-------------------------------------------|
| 43807.1          | -5.95         | -5.40         | type VI secretion protein IcmF            |
| 43808.1          | -6.50         | -6.44         | type VI secretion-associated protein      |
| 43809.1          | -5.14         | -6.67         | type VI secretion-associated protein      |
| 43810.1          | -7.41         | -8.93         | T6SS ATPase                               |
| 43811.1          | -5.37         | -6.89         | chemotaxis protein MotB                   |
| 43812.1          | -7.32         | -6.84         | type VI secretion protein                 |
| 43813.1          | -6.50         | -6.64         | type VI secretion lipoprotein             |
| 43814.1          | -7.76         | -8.20         | type VI secretion protein                 |
| 43815.1          | -8.23         | -7.67         | type VI secretion protein                 |
| 43816.1          | -5.98         | -6.22         | type VI secretion protein                 |
| 43817.1          | -6.56         | -6.66         | type VI secretion protein                 |
| 43879.1          | -7.60         | -7.76         | type VI secretion protein                 |
| 43818.1          | -5.20         | -5.66         | type VI secretion protein                 |
| 42936.1          | -2.59         | -4.01         | type VI secretion system protein          |
| 43831.1          | -2.32         | -2.14         | type VI secretion system tip protein VgrG |
| 41282.1          | -6.39         | -8.50         | type VI secretion protein VgrG            |
| 41118.1          | -3.72         | -5.57         | type VI secretion protein VgrG            |
